# Supplementary material for: A computational study of the quantum transport properties of a Cu–CNT composite
Source: Royal Society of Chemistry journal article supplement (doi:10.1039/c5cp01470k), 2015-01-01
Supplement: c5cp01470k1.pdf [file c5cp01470k1.pdf]

## A computational study of the quantum transport properties of a Cu-CNT composite

Mahdi Ghorbani-Asl, Paul D. Bristowe and Krzysztof Koziol

*Department of Materials Science and Metallurgy, University of Cambridge,  
Cambridge, CB3 0FS, UK.*

### Supplementary Information

Our density functional theory (DFT) calculations were performed using the PBE (Perdew-Burke-Ernzerhof) exchange-correlation functional<sup>1</sup> and double-zeta plus polarization basis set of SIESTA-type numerical orbitals as implemented in the ATK package<sup>2</sup>. London dispersion interactions were included in the total bonding energy as proposed by Grimme<sup>3</sup>.

The interfacial strength<sup>4</sup> (ideal work of separation) has been calculated using:

$$W_{sep} = \frac{E_{Metal} + E_{CNT} - E_{Metal+CNT}}{L}$$

where  $E_{Metal}$ ,  $E_{CNT}$  and  $E_{Metal+CNT}$  represent the total energies of the isolated metal, the isolated CNT and the metal-CNT contact, respectively.  $L$  stands for the contact length.

**Table S1.** Interfacial strengths ( $W_{sep}$ ) of different Cu/CNT (5,5) interfaces from DFT calculations.

| Type of CNT contact | End Contact |       |       | Side contact |       |       |
|---------------------|-------------|-------|-------|--------------|-------|-------|
| Cu Surface          | (100)       | (110) | (111) | (100)        | (110) | (111) |
| $W_{sep}$ (eV/Å)    | 1.227       | 1.153 | 1.196 | 0.983        | 0.980 | 0.821 |

For contact with either the end or side of the CNT, the (100) Cu surface gives the most stable (strongest) interface.



**Table S2.** Experimental and calculated lattice parameters of copper and graphene obtained at the DFTB and DFT level. Units are given in Å.

| Material | Experiment   | DFT          | DFTB         |
|----------|--------------|--------------|--------------|
| Copper   | $a=b=c=3.61$ | $a=b=c=3.67$ | $a=b=c=3.70$ |
| Graphene | $a=b=2.46$   | $a=b=2.48$   | $a=b=2.47$   |

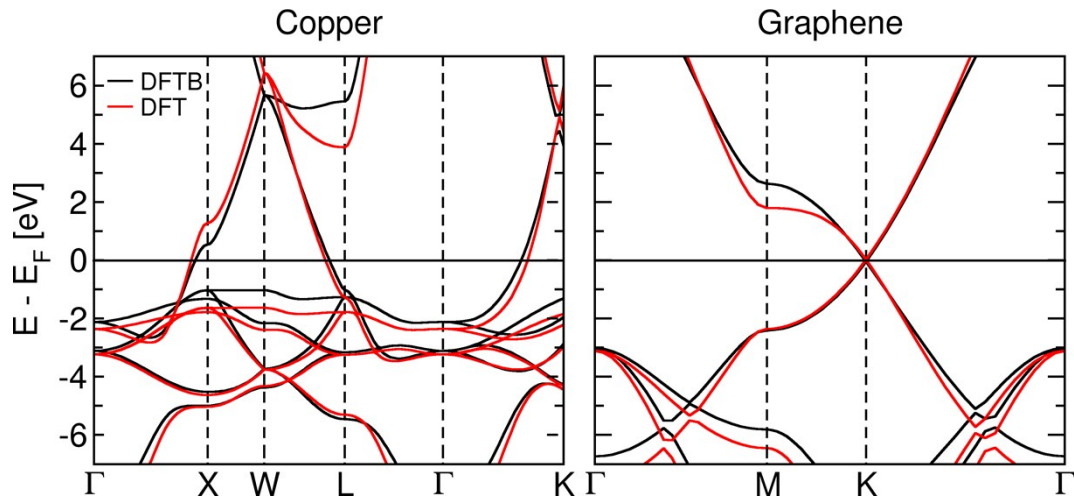

**Figure S1.** (Colour online) DFT and DFTB electronic band structures calculated for bulk copper and graphene.



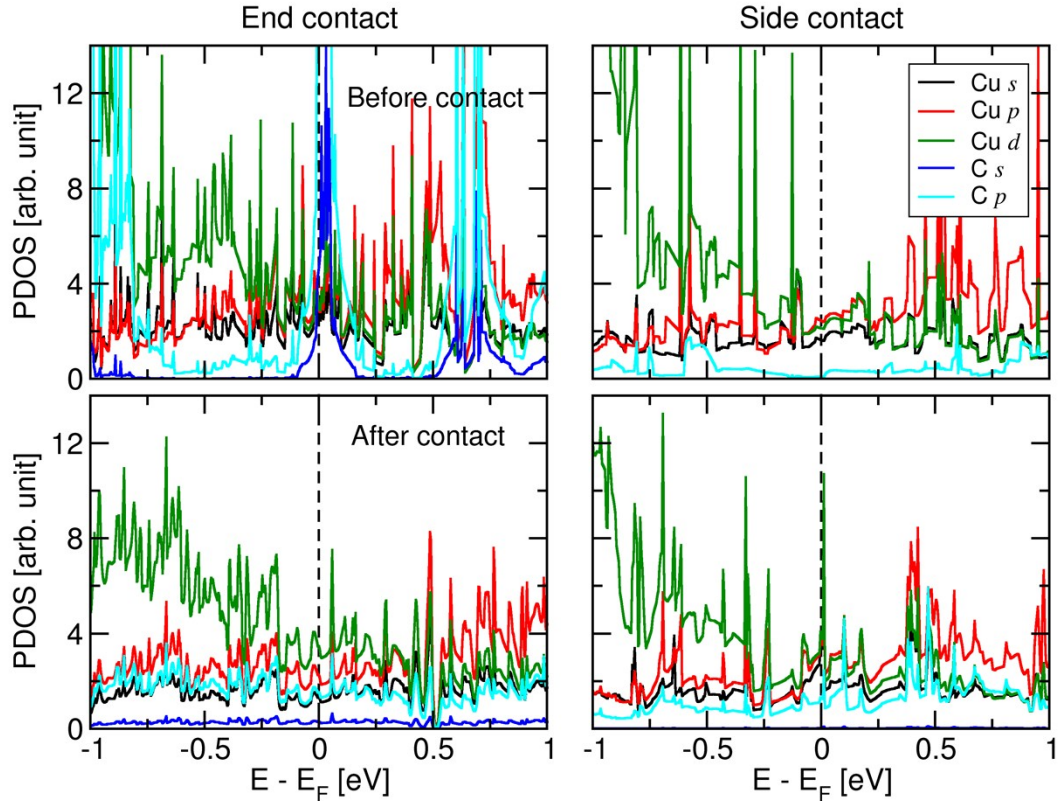

**Figure S2.** (Colour online) Partial density of states (PDOS) for copper ( $s$ ,  $p$  and  $d$  orbitals) and carbon ( $s$  and  $p$  orbitals) at a Cu {100}/CNT (5,5) interface for both the end and side-contact configurations. The calculation performed using DFT/PBE calculations.



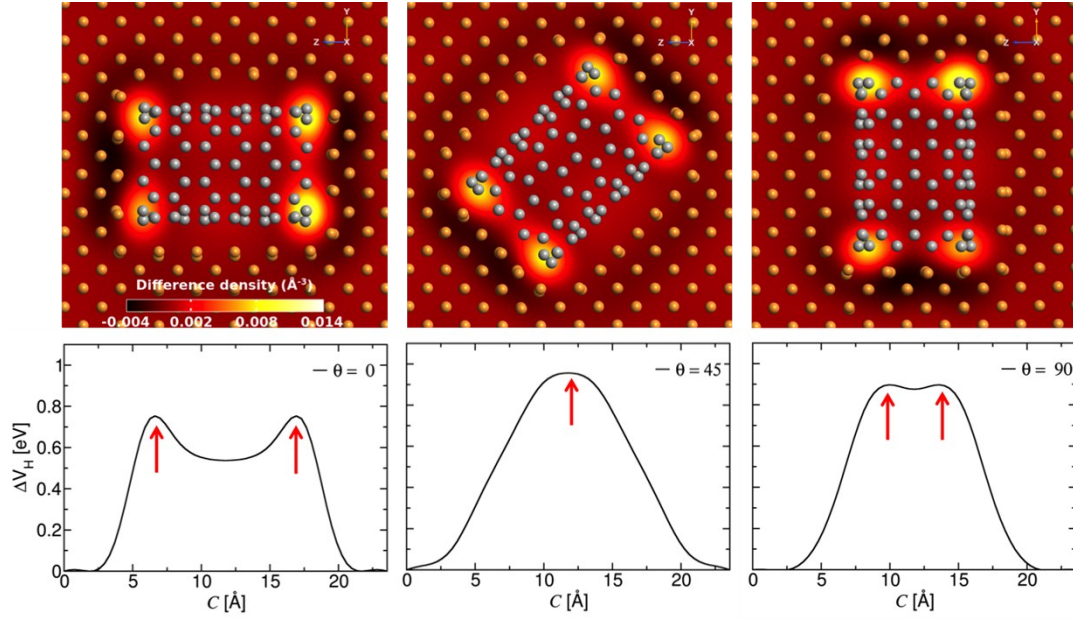

**Figure S3.** (Colour online) Electron difference density maps through cross-sections of the scattering region (upper) and the average electrostatic difference potential along the transport direction (lower) for the three (10,0) Cu-CNT composite orientations considered. The peak positions are indicated with red arrows to highlight the good correspondence between the upper and lower panel.

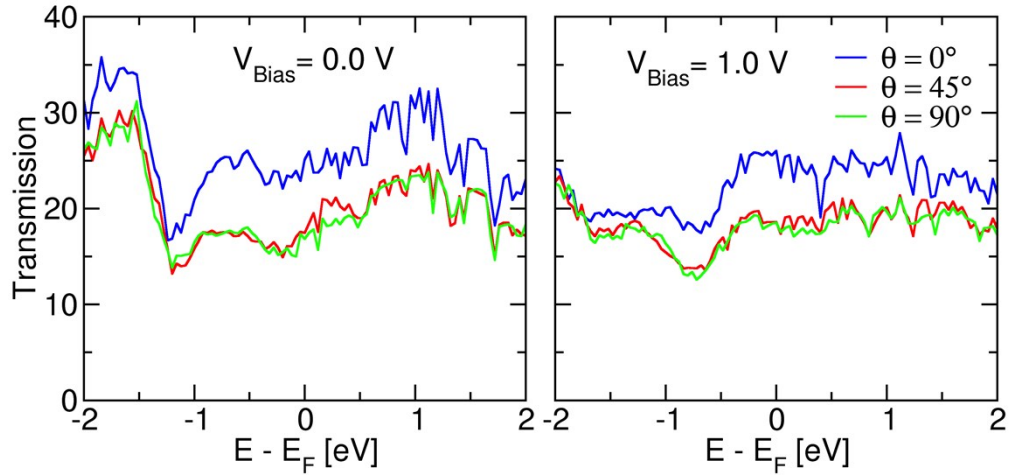

**Figure S4.** (Colour online) Transmission coefficients as a function of energy at  $V_{\text{Bias}} = 0.0$  V and  $V_{\text{Bias}} = 1.0$  V for (10,0) Cu-CNT composites with different values of  $\theta$ . The Fermi level  $E_F$  is shifted to zero.



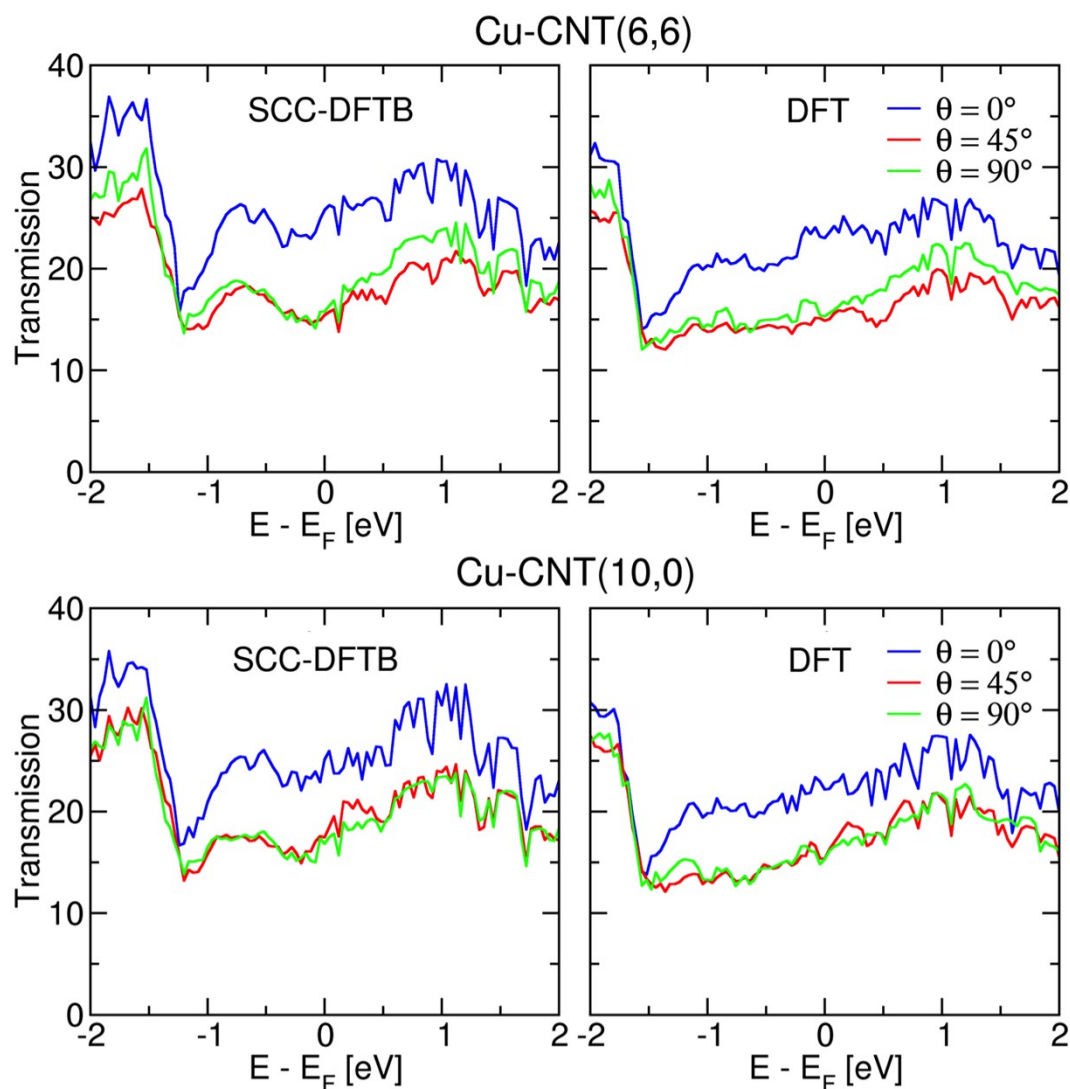

**Figure S5.** (Colour online) Transmission coefficients as a function of energy at  $V_{\text{Bias}} = 0.0$  V obtained at SCC-DFTB and DFT level. The DFT results are obtained using a single-zeta plus polarization basis set and LDA functional. The Fermi level  $E_F$  is shifted to zero.

#### References:

- (1) Perdew, J. P.; Burke, K.; Ernzerhof, M. Generalized gradient approximation made simple *Phys. Rev. Lett.* **1996**, 77 3865–3868.
- (2) Atomistix ToolKit 2014.0, QuantumWise A/S, [www.quantumwise.com](http://www.quantumwise.com).
- (3) Grimme, S. Semiempirical GGA-type density functional constructed with a long-range dispersion correction. *J. Comp. Chem.* **2006**, 27, 1787-1799.
- (4) Lin, Z.; Bristowe P.D. A first principles study of the properties of Al:ZnO and its adhesion to Ag in an optical coating. *J. Appl. Phys.* **2009**, 106 013520.
